# Supplementary material
Source: PubMed Central journal article supplement (PMC7247314)
Supplement: supp_RA119.011667_156786_2_supp_511302_q8sq5d.pdf [file supp_RA119.011667_156786_2_supp_511302_q8sq5d.pdf]

**N-terminal protein acetylation by NatB modulates the levels of Nmnats, the NAD<sup>+</sup> biosynthetic enzymes in *Saccharomyces cerevisiae***

Trevor Croft, Padmaja Venkatakrisnan, Christol James Theoga Raj, Benjamin Groth, Timothy Cater, Michelle R. Salemi, Brett Phinney, and Su-Ju Lin

**SUPPORTING INFORMATION**

|                                            |     |
|--------------------------------------------|-----|
| <b>Cover page</b>                          | S-1 |
| <b>Supporting Figure S1</b>                | S-2 |
| <b>Supporting Figure S1 Figure legends</b> | S-3 |

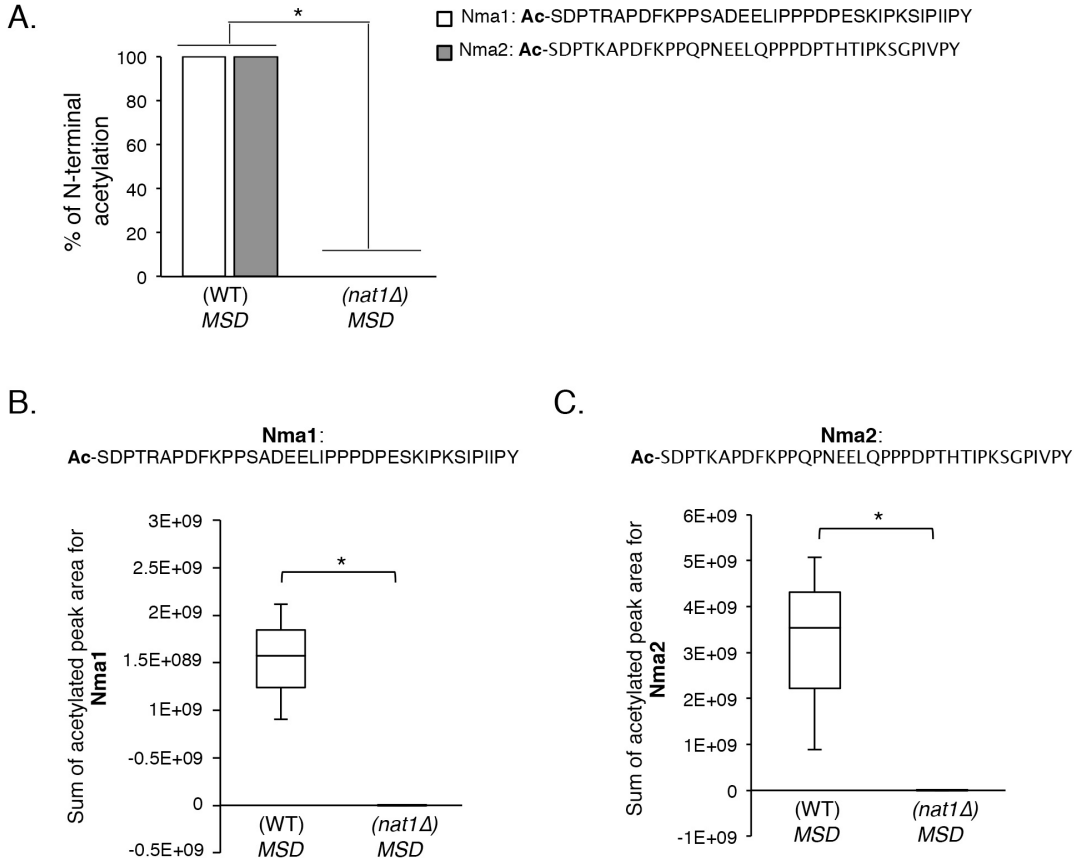

**FIGURE S1. Mass Spectrometry analysis of Nt-acetylation of Nma1 and Nma2 in the MSD (WT) and MSD (*nat1* $\Delta$ ) cells.** *A*, among specific Nma1 and Nma2 N-terminal peptides identified from MSD (WT) cells, 100% are Nt-acetylated at the first serine residue. The initial first methionine is cleaved, which is expected for all NatA substrates. All identified Nma1 and Nma2 N-terminal peptides from the *nat1* $\Delta$  mutant cells are not Nt-acetylated. The percentages of Nt-acetylated Nma1 and Nma2 peptides shown in the graph are calculated using the Scaffold software with the peptide threshold set at 1% (false-discovery rate). A total of three pairs of biological replicates of WT and *nat1* $\Delta$  mutant strains are analyzed in three independent experiments. Detailed methods are shown in the *EXPERIMENTAL PROCEDURES* in the main manuscript. *Error bars* represent data from 3 biological replicates. The *p* values are calculated using Student's *t* test (\*,  $p < 0.05$ ). *B* and *C*, the sum of Nt-acetylated Nma1 and Nma2 peptides and the distribution of 3 biological replicates analyzed in three independent experiments are shown in box plots. The mean values of the WT samples are significantly higher than that of the *nat1* $\Delta$  samples (\*,  $p < 0.05$ ). The *p* values are calculated by the Student's *t* test.
